# Supplementary material for: Intracardiac Echocardiography Guided Transeptal Catheter Injection of Microspheres for Assessment of Cerebral Microcirculation in Experimental Models
Source: Hindawi journal article supplement (doi:10.1155/2013/595838), 2013-01-01
Supplement: f1 [file 595838.f1.pdf]

## Appendix

### Results of RMBF over time by sheep and slice:

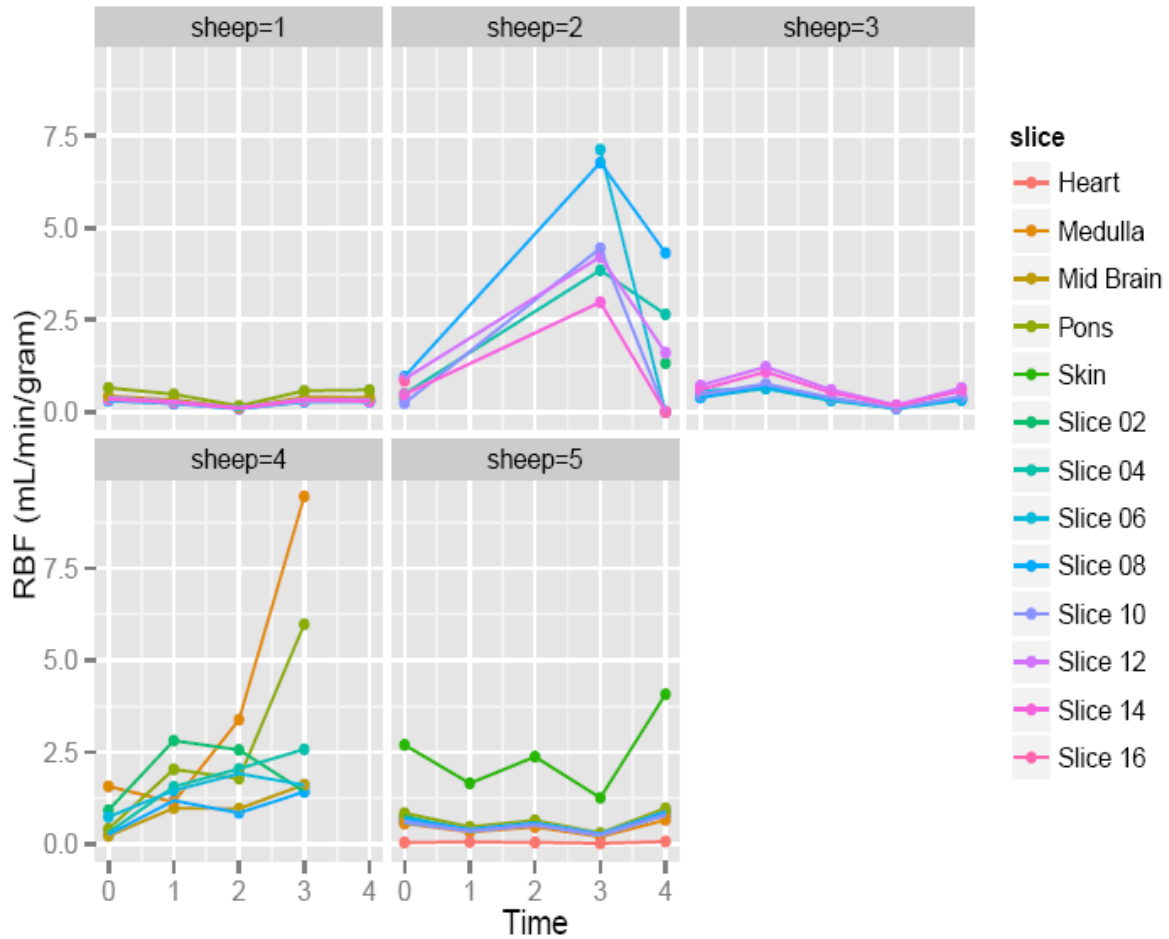

Stable RMBF over time for subject 1, 3 and 5. No Microspheres found in Subject 2 for Times 1 and 2. No microspheres found for time 4 in subject 4. Skin perfusion from subject 5 demonstrating significant variability.

Differences from baseline over time by sheep and slice.

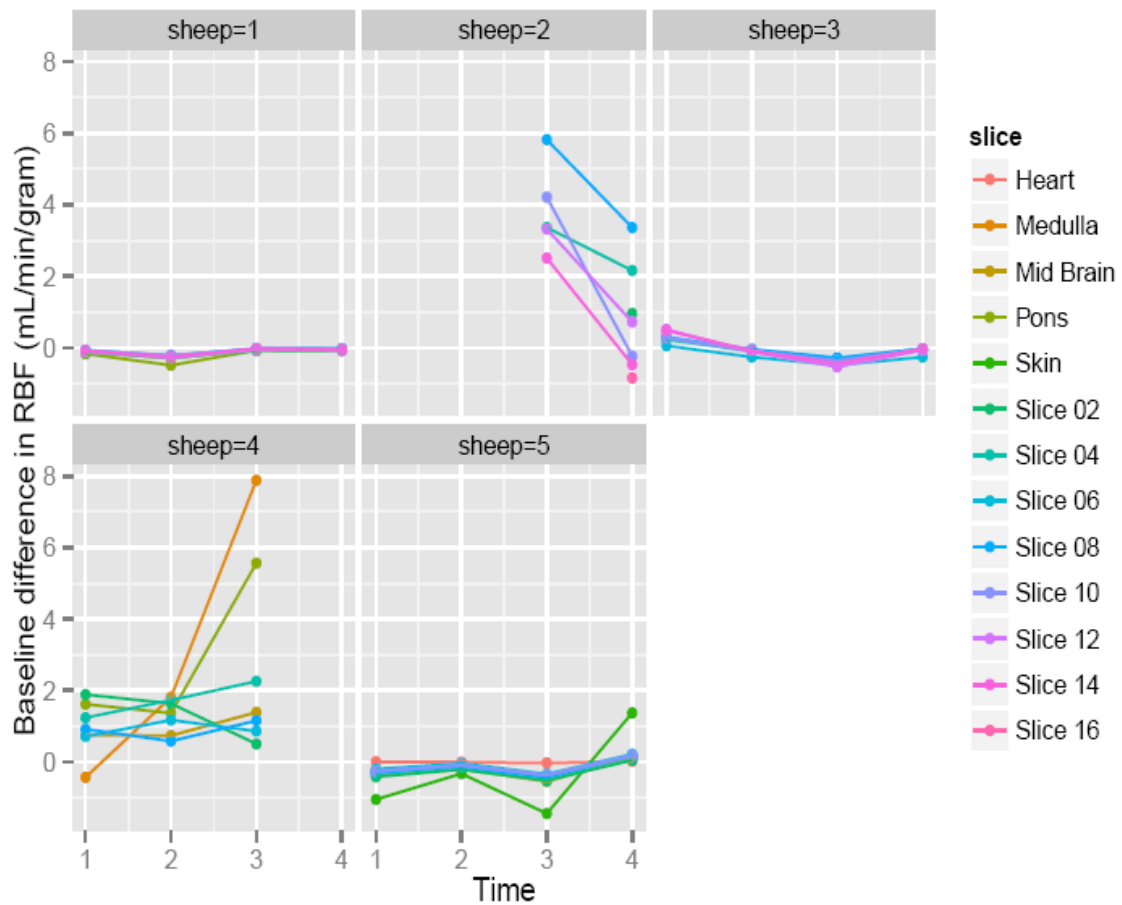

Stable RMBF over time for subject 1, 3 and 5. No Microspheres found in Subject 2 for Times 1 and 2. No microspheres found for time 4 in subject 4. Skin perfusion from subject 5 demonstrating significant variability.

Differences from baseline over time by sheep and tissue.

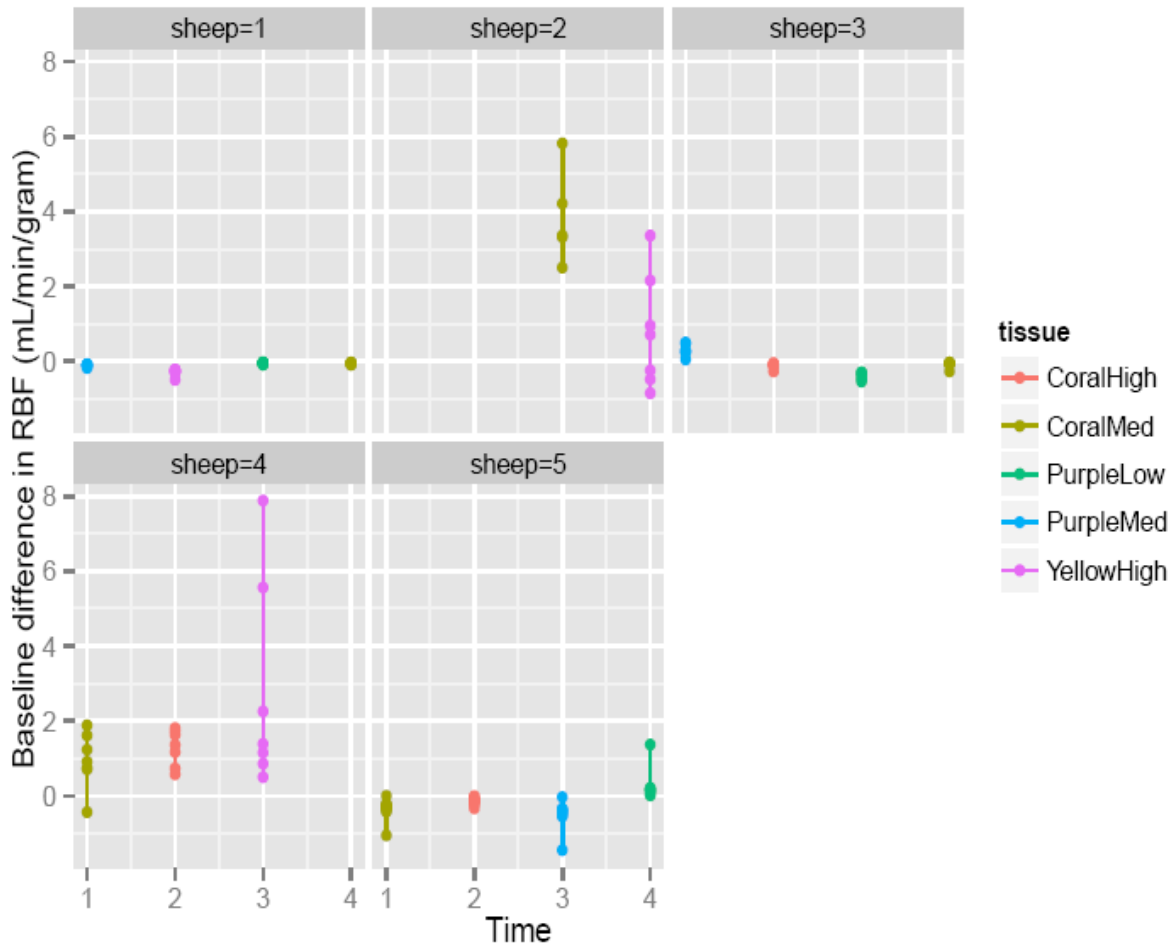

Stable RMBF over time for subject 1, 3 and 5. No Microspheres found in Subject 2 for Times 1 and 2. No microspheres found for time 4 in subject 4. Skin perfusion from subject 5 demonstrating significant variability.
